# Supplementary material for: Inhibition of activin/nodal signalling is necessary for pancreatic differentiation of human pluripotent stem cells
Source: Springer Nature journal article supplement (doi:10.1007/s00125-012-2687-x), 2012-09-26
Supplement: MOESM2 [file 8091108]

Table 1: Antibodies and corresponding dilution

| Target protein                                            | Dilution   | Company                                  |
|-----------------------------------------------------------|------------|------------------------------------------|
| C-PEPTIDE                                                 | ICC 1:300  | ACRIS ANTIBODIES                         |
| CYTOKERATIN 18                                            | ICC 1:100  | SANTA CRUZ                               |
| GATA-4 (G-4)                                              | ICC 1:100  | SANTA CRUZ                               |
| GATA6                                                     | ICC 1:100  | ABCAM                                    |
| GLUCAGON (N-17)                                           | ICC 1:100  | SANTA CRUZ                               |
| HNF1B (C-20)                                              | ICC 1:100  | SANTA CRUZ                               |
| HNF3B/FOXA2                                               | ICC 1:100  | R&D SYSTEMS                              |
| HNF4 (H-171)                                              | ICC 1:100  | SANTA CRUZ:                              |
| HNF-6 (H-100)                                             | ICC 1:100  | SANTA CRUZ                               |
| NGN3                                                      | ICC 1:300  | R&D SYSTEMS                              |
| NKX6.1 (GS-9A8)                                           | ICC 1:50   | THE DEVELOPMENTAL STUDIES HYBRIDOMA BANK |
| PDX-1/IPF1                                                | ICC/ 1:300 | R&D SYSTEMS                              |
| PDX-1/IPF1 (IC2419A)                                      | FC         | R&D SYSTEMS                              |
| PRO-INSULIN                                               | ICC 1:50   | THE DEVELOPMENTAL STUDIES HYBRIDOMA BANK |
| SOMATOSTATIN                                              | ICC 1:200  | DAKO                                     |
| SOX9 H-90                                                 | ICC 1:100  | SANTACRUZ:                               |
| ALEXA FLUOR® 488 DONKEY ANTI-MOUSE IGG (H+L) *2 MG/ML*    | ICC 1:2000 | INVITROGEN                               |
| ALEXA FLUOR® 488 GOAT ANTI-GUINEA PIG IGG (H+L) *2 MG/ML* | ICC 1:2000 | INVITROGEN                               |
| ALEXA FLUOR® 488 DONKEY ANTI-GOAT IGG (H+L) *2 MG/ML*     | ICC 1:2000 | INVITROGEN                               |
| ALEXA FLUOR 568 DONKEY ANTI GOAT IGG (H+L) *2 MG/ML*      | ICC 1:2000 | INVITROGEN                               |
| ALEXA FLUOR 568 DONKEY ANTI RABBIT IGG (H+L) *2 MG/ML*    | ICC 1:2000 | INVITROGEN                               |
| ALEXA FLUOR® 647 DONKEY ANTI-GOAT IGG (H+L) *2 MG/ML*     | FL 1:2000  | INVITROGEN                               |
| ALEXA FLUOR® 647 DONKEY ANTI-RABBIT IGG (H+L) *2 MG/ML*   | FL 1:2000  | INVITROGEN                               |
| APC-conjugated isotype control                            | FL         | R&D SYSTEMS                              |

#
