# Supplementary figures and images for: Inhibition of activin/nodal signalling is necessary for pancreatic differentiation of human pluripotent stem cells
Source: Springer Nature journal article supplement (doi:10.1007/s00125-012-2687-x), 2012-09-26

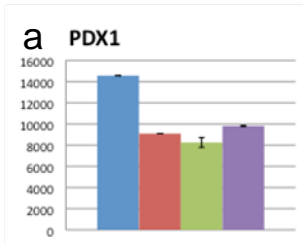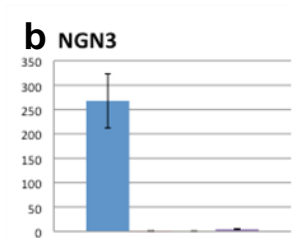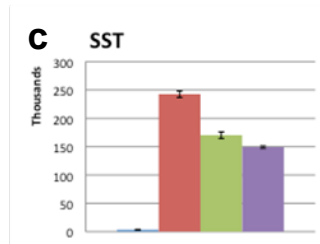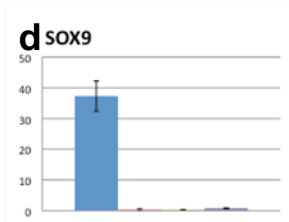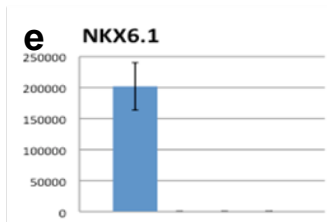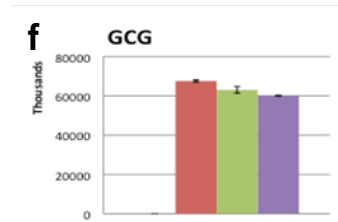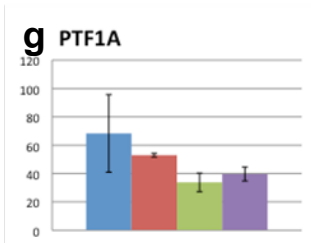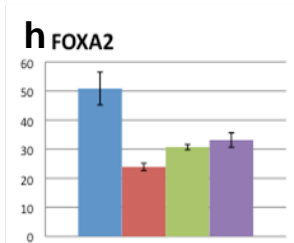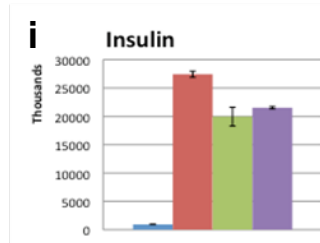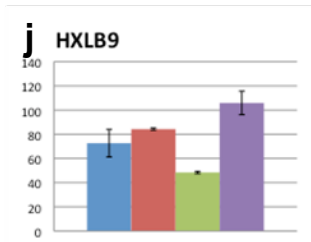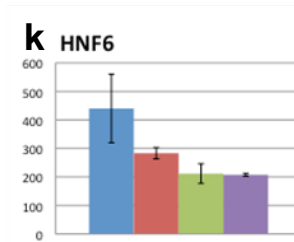

Supplement: MOESM4 [file 8091108]
